# Supplementary material for: Aromaticity of neutral and doubly charged polyacenes
Source: Royal Society of Chemistry journal article supplement (doi:10.1039/b903815a), 2009-01-01
Supplement: b903815a.pdf [file b903815a.pdf]

## Electronic Supplementary Information

### NICS Values for Neutral and Doubly Charged Polyacenes

Toshimasa Ishida and Jun-ichi Aihara

We first present tables of NICS values for neutral and doubly charged polyacenes in closed-shell electronic configuration. These NICS values were calculated at the B3LYP/6-31G\* level of theory<sup>42</sup> using the GIAO method.<sup>49</sup> They are presumably useful for many studies, although most of them were not referred to in the present study. In Tables S1–S3, species **1**, **2**, **3**, **4**, **5**, **6**, **7**, **8** and **9** represent benzene, naphthalene, anthracene, naphthacene, pentacene, hexacene, heptacene, octacene and nonacene, respectively. For types of rings in Tables S1-S3 and references cited in this Electronic Supplementary Information, see the text.

Fig. S1 shows a plot of the HOMA index against the peripheral BRE for all non-identical benzene rings in **1-9**. A good correlation with a correlation coefficient of 0.974 is found between these two quantities. Somewhat scattered points are due to benzene rings with BREs  $< 0.150 |\beta|$ , which implies that the HOMA index might be sensitive to the molecular geometry employed when the ring concerned is not highly aromatic.<sup>34</sup>

**Table S1** NICS values for neutral polyacene molecules in closed-shell electronic configuration.

| Species  | Ring a | Ring b | Ring c | Ring d | Ring e | Weighted average |
|----------|--------|--------|--------|--------|--------|------------------|
| <b>1</b> | -9.67  |        |        |        |        | -9.67            |
| <b>2</b> | -9.99  |        |        |        |        | -9.99            |
| <b>3</b> | -8.84  | -12.60 |        |        |        | -10.09           |
| <b>4</b> | -7.83  | -12.59 |        |        |        | -10.21           |
| <b>5</b> | -7.06  | -12.05 | -13.49 |        |        | -10.34           |
| <b>6</b> | -6.48  | -11.42 | -13.50 |        |        | -10.47           |
| <b>7</b> | -6.05  | -10.85 | -13.18 | -13.94 |        | -10.59           |
| <b>8</b> | -5.74  | -10.38 | -12.78 | -13.92 |        | -10.71           |
| <b>9</b> | -5.50  | -9.99  | -12.38 | -13.71 | -14.14 | -10.81           |

**Table S2** NICS values for the molecular dications of polyacenes in closed-shell electronic configuration.

| Species               | Ring a | Ring b | Ring c | Ring d | Ring e | Weighted average |
|-----------------------|--------|--------|--------|--------|--------|------------------|
| <b>1<sup>2+</sup></b> | 88.34  |        |        |        |        | 88.34            |
| <b>2<sup>2+</sup></b> | 30.83  |        |        |        |        | 30.83            |
| <b>3<sup>2+</sup></b> | 10.94  | 16.37  |        |        |        | 12.75            |
| <b>4<sup>2+</sup></b> | 2.89   | 8.21   |        |        |        | 5.55             |
| <b>5<sup>2+</sup></b> | -1.19  | 2.82   | 4.70   |        |        | 1.59             |
| <b>6<sup>2+</sup></b> | -3.44  | -0.83  | 1.52   |        |        | -0.92            |
| <b>7<sup>2+</sup></b> | -4.75  | -3.37  | -1.05  | -0.24  |        | -2.65            |
| <b>8<sup>2+</sup></b> | -5.54  | -5.17  | -3.09  | -1.94  |        | -3.93            |
| <b>9<sup>2+</sup></b> | -6.04  | -6.48  | -4.71  | -3.43  | -2.99  | -4.92            |

**Table S3** NICS values for the molecular dianions of polyacenes in closed-shell electronic configuration.

| Species               | Ring a | Ring b | Ring c | Ring d | Ring e | Weighted average |
|-----------------------|--------|--------|--------|--------|--------|------------------|
| <b>1<sup>2-</sup></b> | 117.68 |        |        |        |        | 117.68           |
| <b>2<sup>2-</sup></b> | 43.46  |        |        |        |        | 43.46            |
| <b>3<sup>2-</sup></b> | 15.33  | 19.03  |        |        |        | 16.56            |
| <b>4<sup>2-</sup></b> | 5.32   | 8.83   |        |        |        | 7.08             |
| <b>5<sup>2-</sup></b> | 0.73   | 3.06   | 3.85   |        |        | 2.29             |
| <b>6<sup>2-</sup></b> | -1.57  | -0.40  | 0.26   |        |        | -0.57            |
| <b>7<sup>2-</sup></b> | -2.77  | -2.52  | -2.20  | -2.27  |        | -2.46            |
| <b>8<sup>2-</sup></b> | -3.37  | -3.81  | -3.85  | -4.21  |        | -3.81            |
| <b>9<sup>2-</sup></b> | -3.65  | -4.55  | -4.90  | -5.60  | -5.94  | -4.82            |

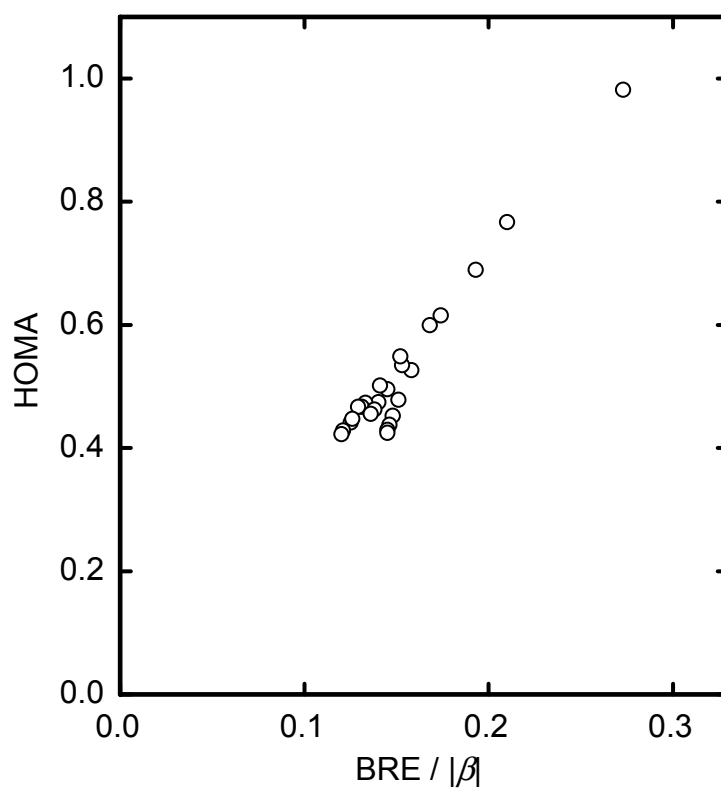

**Fig. S1** Correlation between the local HOMA index and the peripheral BRE for all non-identical benzene rings in **1-9**.
